# Supplementary material for: Morphology-tunable synthesis of ZnO microstructures under microwave irradiation: formation mechanisms and photocatalytic activity
Source: Royal Society of Chemistry journal article supplement (doi:10.1039/c5ce02334c), 2015-12-28
Supplement: c5ce02334c1.pdf [file c5ce02334c1.pdf]

†Electronic Supplementary Information

**Morphology-tunable synthesis of ZnO microstructures under microwave irradiation: formation mechanisms and photocatalytic activity**

*Hyung-Bae Kim, Dong-Won Jeong, and Du-Jeon Jang\**

Department of Chemistry, Seoul National University, NS60, Seoul 08826, Korea

E-mail: [djjang@snu.ac.kr](mailto:djjang@snu.ac.kr)

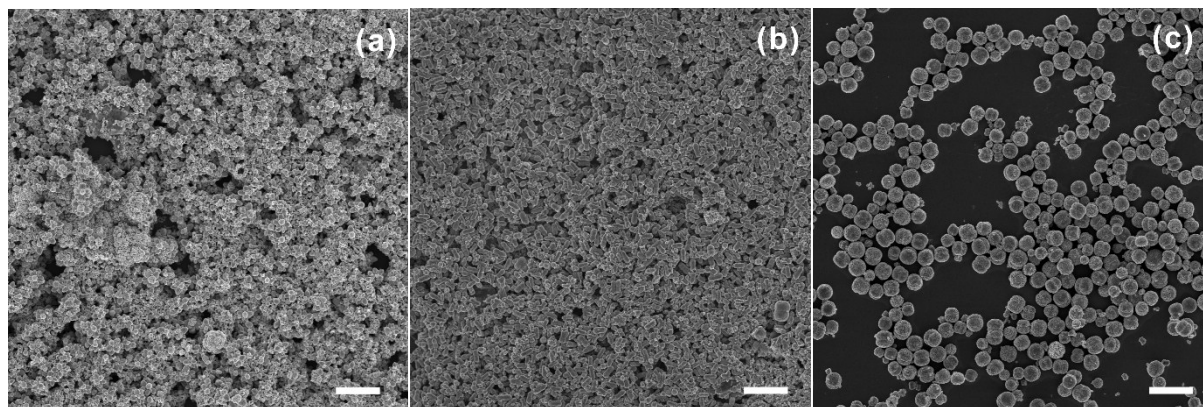

**Fig. S1** Low-magnification SEM images of ZnO microstructures prepared at different ammonia concentrations of (a) 0 mM, (b) 43 mM, and (c) 170 mM. Each scale bar indicates 6  $\mu\text{m}$ .

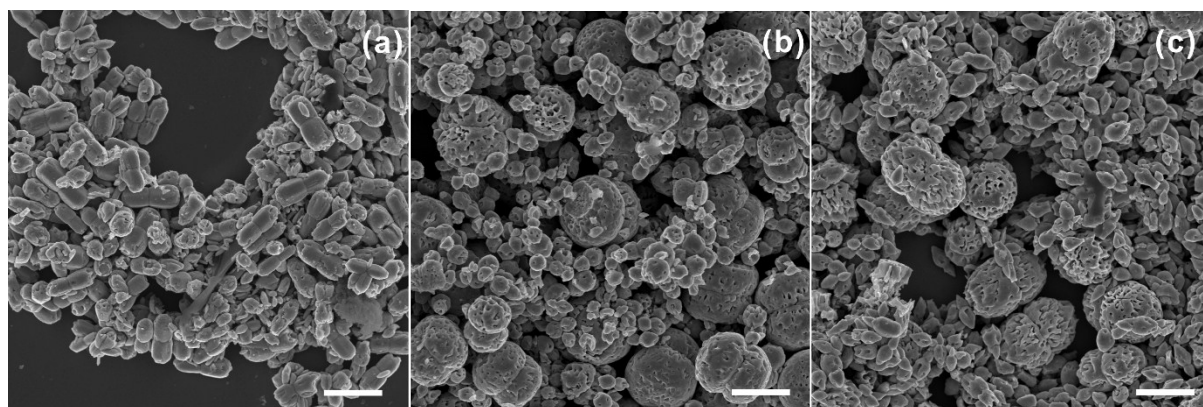

**Fig. S2** SEM images of ZnO microstructures prepared at different ammonia concentrations of (a) 17 mM, (b) 85 mM, and (c) 260 mM. Each scale bar indicates 2  $\mu\text{m}$ .

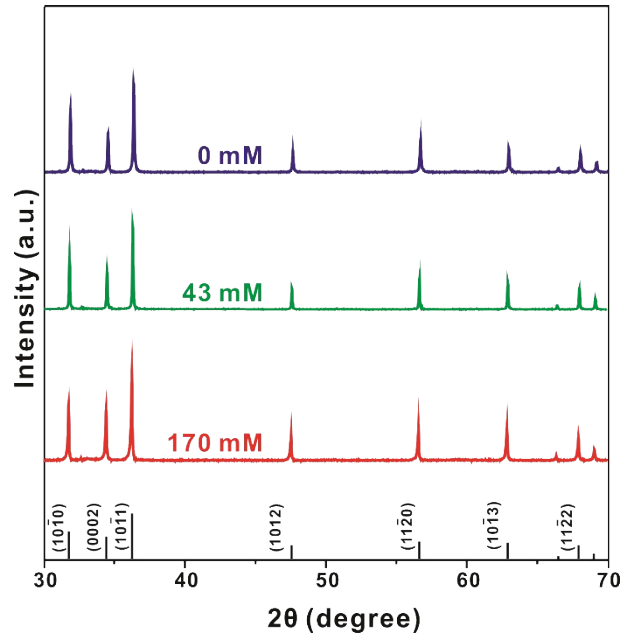

**Fig. S3** HRXRD patterns of ZnO microstructures prepared at indicated ammonia concentrations for 10 min. The standard diffraction pattern of the hexagonal wurtzite ZnO is also shown in the bottom.

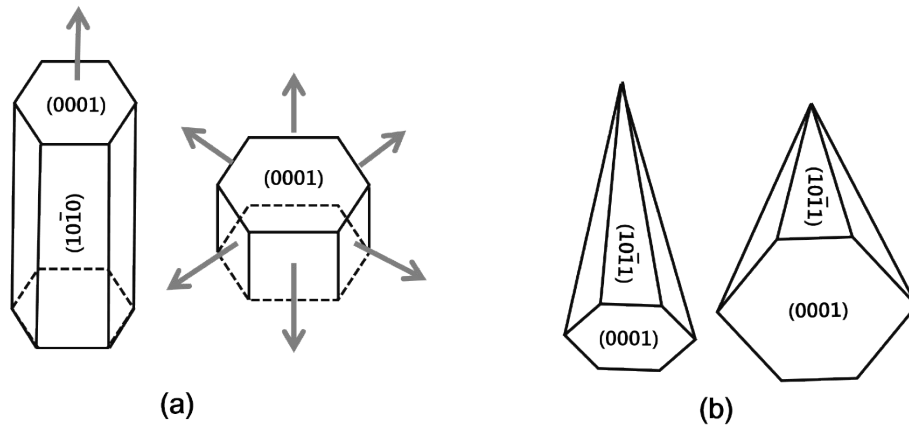

**Fig. S4** Schematic illustrations of the hexagonal wurtzite ZnO structures, showing compensatory correlation (a) between (0001) planes and (100) planes and (b) between (0001) planes and (101) planes. Arrows indicate growth directions.

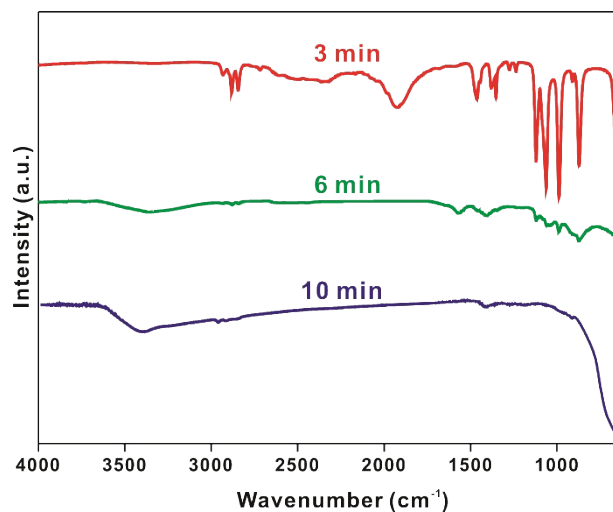

**Fig. S5** FTIR spectra of ZnO microstructures synthesized for indicated reaction times at a particular ammonia concentration of 170 mM.

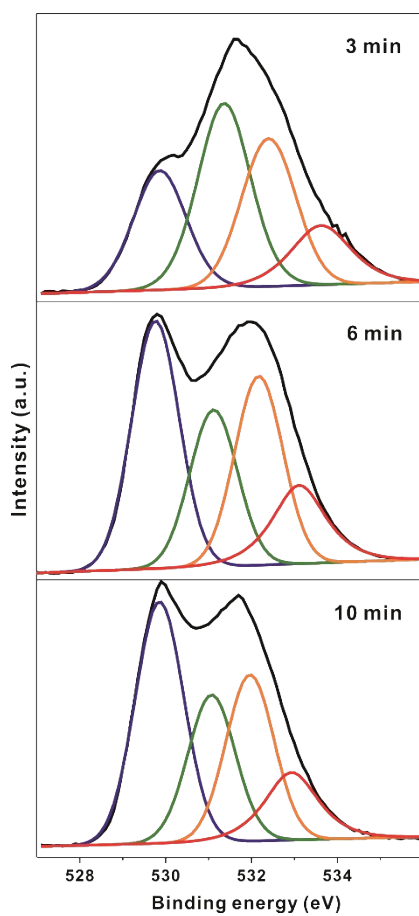

**Fig. S6** O 1s XPS spectra of ZnO microstructures synthesized for indicated reaction times at a particular ammonia concentration of 170 mM.

**Table S1. Binding Energies in eV for the Deconvoluted Curves of O 1s XPS Spectra**

| Reaction time | Zn-O-Zn                  | Zn-O <sub>x</sub> -Zn <sup>a</sup> | Zn-O-H         | Zn-O-C      | C-O-H       |
|---------------|--------------------------|------------------------------------|----------------|-------------|-------------|
| 3 min         | 529.9 (23%) <sup>b</sup> | 531.4 (35%)                        | - <sup>c</sup> | 532.4 (29%) | 533.5 (13%) |
| 6 min         | 529.8 (37%)              | 531.1 (24%)                        | -              | 532.3 (27%) | 533.1 (12%) |
| 10 min        | 529.8 (38%)              | 531.1 (24%)                        | 531.9 (26%)    | 532.7 (12%) | -           |

<sup>a</sup>Oxygen-deficient ZnO<sub>x</sub> (0 < x < 1). <sup>b</sup>Area percentage of each peak. <sup>c</sup>Not observed.

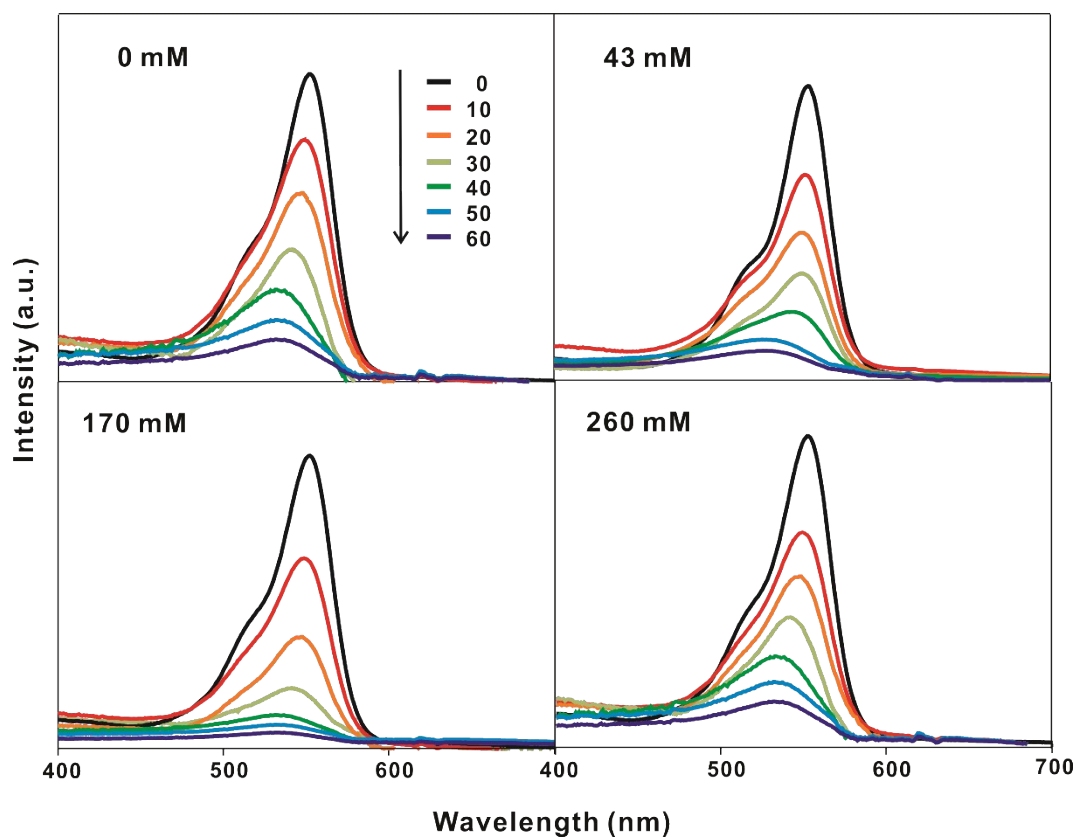

**Fig. S7** Absorption spectra of 10  $\mu$ M RhB solutions, in the presence of light with ZnO microstructures prepared at indicated ammonia concentrations, measured at elapsed times indicated in the units of min.
